# Supplementary material for: Developmental profiling of microRNAs in the human embryonic inner ear
Source: PubMed Central journal article supplement (PMC5786302; doi:10.1371/journal.pone.0191452), 2018-01-26

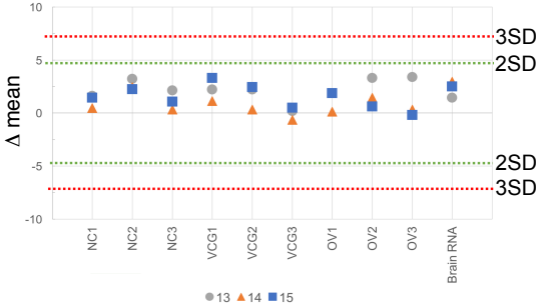

Supplement: pone.0191452.s002.pdf [file pone.0191452.s002.pdf]
