# Supplementary material for: Developmental profiling of microRNAs in the human embryonic inner ear
Source: PubMed Central journal article supplement (PMC5786302; doi:10.1371/journal.pone.0191452), 2018-01-26
Supplement: pone.0191452.s006.pdf [file pone.0191452.s006.pdf]

# Enriched Pathways

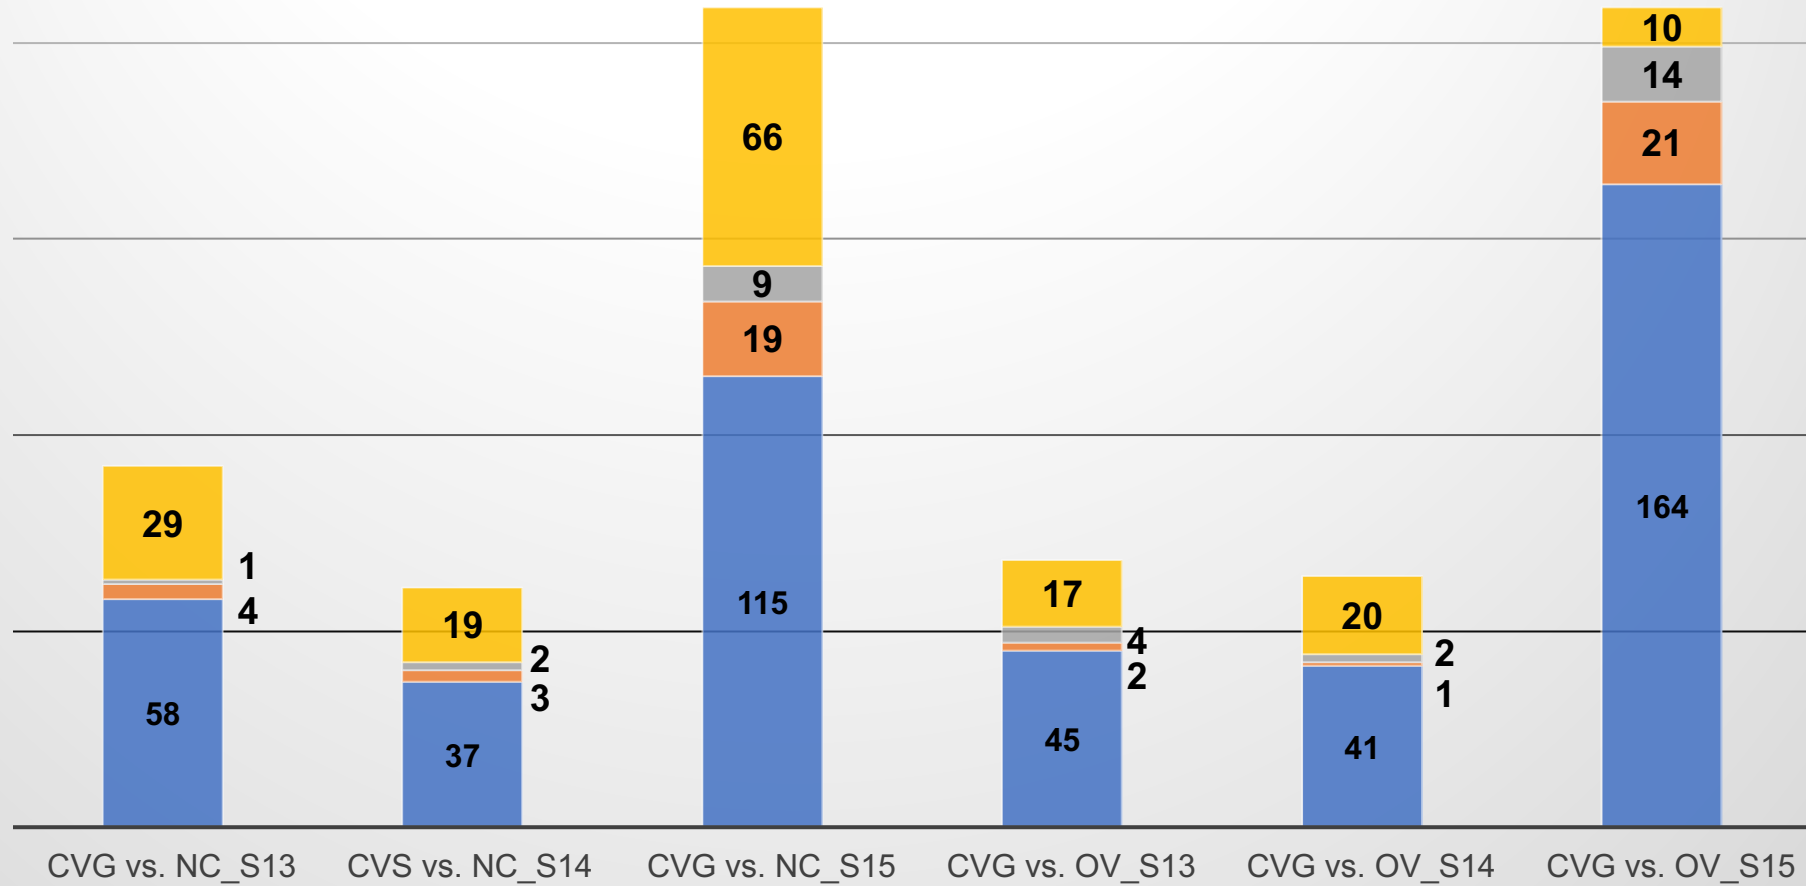

■ Biological function

■ Molecular Function

■ Cellular Component

■ Other
