# Supplementary material for: Developmental profiling of microRNAs in the human embryonic inner ear
Source: PubMed Central journal article supplement (PMC5786302; doi:10.1371/journal.pone.0191452), 2018-01-26
Supplement: pone.0191452.s007.pdf [file pone.0191452.s007.pdf]

# CVG vs.NC S14

|                                                              |                                                                                   |                                                                     |                                                       |                                                                  |
|--------------------------------------------------------------|-----------------------------------------------------------------------------------|---------------------------------------------------------------------|-------------------------------------------------------|------------------------------------------------------------------|
| regulation of membrane protein ectodomain proteolysis        | regulation of cholesterol homeostasis                                             | negative regulation of cofactor metabolic process                   | blastocyst growth                                     | regulation of urine volume                                       |
| <b>regulation of membrane protein ectodomain proteolysis</b> |                                                                                   |                                                                     | lung epithelium development                           | corpus callosum development                                      |
| regulation of appetite                                       | negative regulation of nucleotide catabolic process                               | negative regulation of nucleoside metabolic process                 | <b>blastocyst growth</b>                              |                                                                  |
| negative regulation of keratinocyte proliferation            | regulation of insulin secretion involved in cellular response to glucose stimulus | negative regulation of macrophage derived foam cell differentiation | negative regulation of leukocyte chemotaxis           | response to stimulus involved in regulation of muscle adaptation |
|                                                              |                                                                                   |                                                                     | forebrain neuron fate commitment                      | <b>neuron maturation</b> myeloid cell development                |
| response to amphetamine                                      | cellular response to ethanol                                                      | maintenance of cell polarity                                        |                                                       | heterochromatin organization                                     |
| <b>response to amphetamine</b>                               |                                                                                   | <b>maintenance of cell polarity</b>                                 |                                                       | <b>heterochromatin organization</b>                              |
| mismatch repair                                              | cell death in response to oxidative stress                                        | inositol metabolic process                                          | chondroitin sulfate proteoglycan biosynthetic process | exit from mitosis                                                |
|                                                              | positive regulation of endoplasmic reticulum unfolded protein response            |                                                                     |                                                       |                                                                  |
